# Supplementary material
Source: publisher figshare collection journal article supplement (https://frontiersin.figshare.com/ndownloader/files/22926131)
Supplement: Supplementary file 1 [file 22926131]

## Sheet: Table1
Table 1: List of investigated samples, their localities and their order in eruptive sequence.
Sample	Easting	Northing	Sample type	Date of emplacement	Seq.#
SD04	784657	1653400	well sorted glassy lapilli, highly vesicular	mid-January 2015	8
SD06	784680	1653441	fragments of volcanic bomb cratering tephra sequence	mid-January 2015 to end of eruption	9
SD08	784711	1653660	fragments of mingled volcanic bomb	mid-January 2015 to end of eruption	9
SD10	784559	1653182	blocky fragments from rubbly flow front ~2 m high	23 or 24 November 2014 (early)	1
SD11	784646	1652341	from low-vesicularity lava in a'a flow front ~ 5 m high	23 or 24 November 2014 (later)	2
SD13	784140	1653197	pieces from slabby pahoehoe lava flow	mid-January 2015	8
SD16	783110	1657295	low-vesicularity pieces from a'a flow	16 December 2014	7
SD19	781947	1656265	pieces from low-vesicularity layer in slabby pahoehoe flow	8 or 9 December 2014	5
SD20	783035	1655328	moderately vesicular pieces from disrupted slabby pahoehoe	14 December 2014	6
SD21	782824	1656045	vesicular pieces from pahoehoe	7 December 2014	4
SD22	782836	1656503	lava from a'a flow, some brownish or greenish surfaces	30 November to 7 December 2014	3
Sample localities refer to UTM Zone 26P / WGS84. Seq.# is the order in the eruptive sequence.
